# Supplementary material for: Effects of a Combined Community Exercise Program in Obstructive Sleep Apnea Syndrome: A Randomized Clinical Trial
Source: MDPI journal article supplement (doi:10.3390/jcm8030361), 2019-03-14
Supplement: s1 [file appendix 2. recom hipokcal Neumo.pdf › appendix 2. recom hipokcal Neumo.pdf]

## DISTRIBUCIÓN DIARIA DEL PLAN ALIMENTARIO

|                   |                                                                                                                                                                                                 |
|-------------------|-------------------------------------------------------------------------------------------------------------------------------------------------------------------------------------------------|
| DESAYUNO          | Lácteo desnatado<br>Féculas (pan, biscottes, cereales)<br>Aceite de oliva (opcional)<br>Embutido magro, queso fresco o light                                                                    |
| MEDIA MAÑANA      | Fruta o lácteo desnatado                                                                                                                                                                        |
| COMIDA            | <div> <div> Verduras, ensalada Féculas Cárnicos </div> <div> <u>Aceite de oliva:</u> 1-2 cucharadas soperas<br/> <u>Postre:</u> fruta o lácteo desnatado<br/> <u>Bebida:</u> agua </div> </div> |
| MERIENDA          | Fruta y yogur desnatado                                                                                                                                                                         |
| CENA              | <div> <div> Verduras, ensalada Féculas Cárnicos </div> <div> <u>Aceite de oliva:</u> 1-2 cucharadas soperas<br/> <u>Postre:</u> fruta o lácteo desnatado<br/> <u>Bebida:</u> agua </div> </div> |
| COLACIÓN NOCTURNA | Fruta o lácteo desnatado                                                                                                                                                                        |

Realice de 4 a 6 comidas al día, las que se adapten mejor a su horario habitual.

| CLÍNICA<br>BARCELONA<br>Hospital Universitari | PROPIETARI           | DATA<br>EDICIÓ | CODI                     |
|-----------------------------------------------|----------------------|----------------|--------------------------|
|                                               | Nutrició i dietètica | Octubre - 2016 | A_HCB_ICMDM_DIN_11_12_01 |

## RECOMENDACIONES DIETÉTICAS PARA EL CONTROL DEL PESO

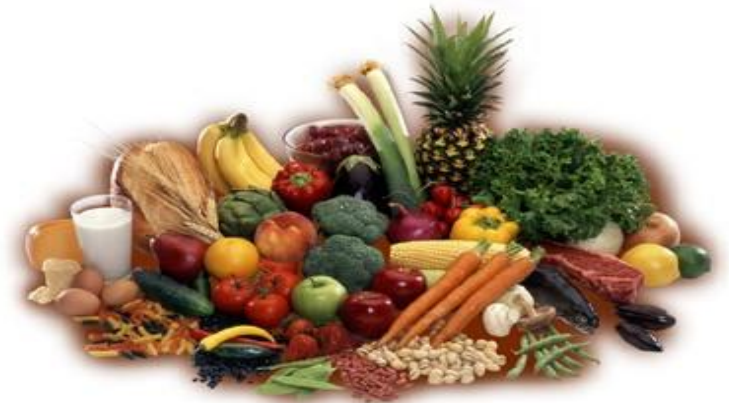

**NUTRICIÓN Y DIETÉTICA CLÍNICA**  
ICMDM - HOSPITAL CLÍNIC DE BARCELONA

Una dieta debe ser equilibrada, variada, apetitosa y saludable, incluso cuando se controla el peso. A continuación se le indican unas pautas para tener hábitos dietéticos saludables.

### RECOMENDACIONES GENERALES

-Una **dieta fraccionada** favorece la digestión y ayuda a no picar entre horas. Procure llevar un horario regular de comidas, no dejando pasar más de 4 horas entre ellas y así evitará tener sensación de hambre.

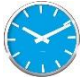

-**Coma poco a poco**, masticando bien los alimentos para aumentar la sensación de saciedad.

-Una buena **hidratación** es fundamental. La principal bebida de elección debe ser el agua y se recomienda tomar entre 6 y 8 vasos diarios.

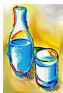

-El **ejercicio físico** es imprescindible para mantener un estilo de vida saludable. Combinado con unos hábitos alimentarios adecuados le ayudará a conseguir mejores resultados en la pérdida de peso.  
Recuerde: Ud. debe ingerir menos calorías de las que gasta.

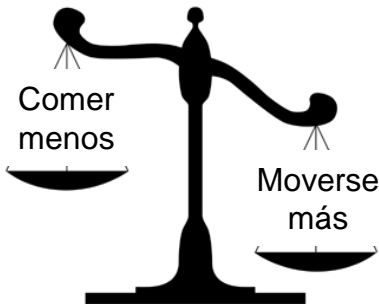

|                                                                                                            | PERMITIDOS                                                                                                     | A LIMITAR<br>(2 VECES X SEMANA)                                                | NO RECOMENDADOS                                                                                            |
|------------------------------------------------------------------------------------------------------------|----------------------------------------------------------------------------------------------------------------|--------------------------------------------------------------------------------|------------------------------------------------------------------------------------------------------------|
| LÁCTEOS Y DERIVADOS<br> | Leche y yogur desnatado. Productos elaborados con leche desnatada.<br>Queso fresco o con bajo contenido graso. | Leche semidesnatada.                                                           | Leche entera. Todos los demás quesos. Nata y crema de leche. Flanes, natillas, cremas, cuajadas y batidos. |
| PESCADOS Y MARISCOS                                                                                        | Pescado blanco y azul. Marisco (crustáceos y moluscos). Conservas al natural.                                  | Conservas en aceites vegetales.                                                | Frituras comerciales o con aceites no recomendados.                                                        |
| CARNES, AVES y HUEVOS                                                                                      | Pollo, pavo, conejo (sin piel y sin grasa). Huevos                                                             | Ternera, buey, caballo, cordero, cerdo, jamón (sin grasa), hamburguesas magras | Embutidos, salchichas, beicon, hamburguesas, vísceras. Patés. Pato . Piel de pollo y pavo.                 |
| FÉCULAS<br>             | Pan (ración: 40g), Pasta alimenticia, arroz, patata, legumbres, maíz y otros cereales (raciones pequeñas).     |                                                                                | Bollería en general, galletas, aperitivos tipo ganchitos, cortezas, etc. Patatas chips.                    |
| FRUTAS, VERDURAS                                                                                           | Verduras, ensaladas: Todas<br>Frutas: 3 raciones al día                                                        | Uva, plátano, cerezas, chirimoya, higos.                                       | Coco. Aguacate, aceitunas.                                                                                 |
| GRASAS Y ACEITES<br>    | Aceite de oliva (preferentemente). Aceites de semillas (girasol, maíz).                                        |                                                                                | Margarinas. Mantequilla, manteca de cerdo, tocino, sebo. Aceites de palma y coco.                          |
| FRUTOS SECOS                                                                                               |                                                                                                                | Todos.                                                                         | Cacahuets                                                                                                  |
| DULCES                                                                                                     |                                                                                                                |                                                                                | Todos.                 |
| BEBIDAS<br>           | Agua mineral, café, infusiones.                                                                                | Zumos, refrescos light.                                                        | Refrescos con azúcar, bebidas alcohólicas (Vino, cerveza, bebidas de alta graduación)                      |
| ESPECIAS Y SALSAS                                                                                          | Todas las especias. Vinagre.                                                                                   | Mayonesa. Salsas elaboradas con aceite de oliva, mostaza y alioli.             | Bechamel y salsas que contengan leche entera, mantequilla y/o grasas de origen animal.                     |
| COCCIONES<br>         | Al horno, a la brasa, hervido, a la plancha, al vapor, papillote, salteado con sartén antiadherente, etc.      | Estofados.                                                                     | Fritos, rebozados, guisos con chorizo, bacon, etc.                                                         |
